# Supplementary material
Source: publisher figshare collection journal article supplement (https://frontiersin.figshare.com/ndownloader/files/31110457)

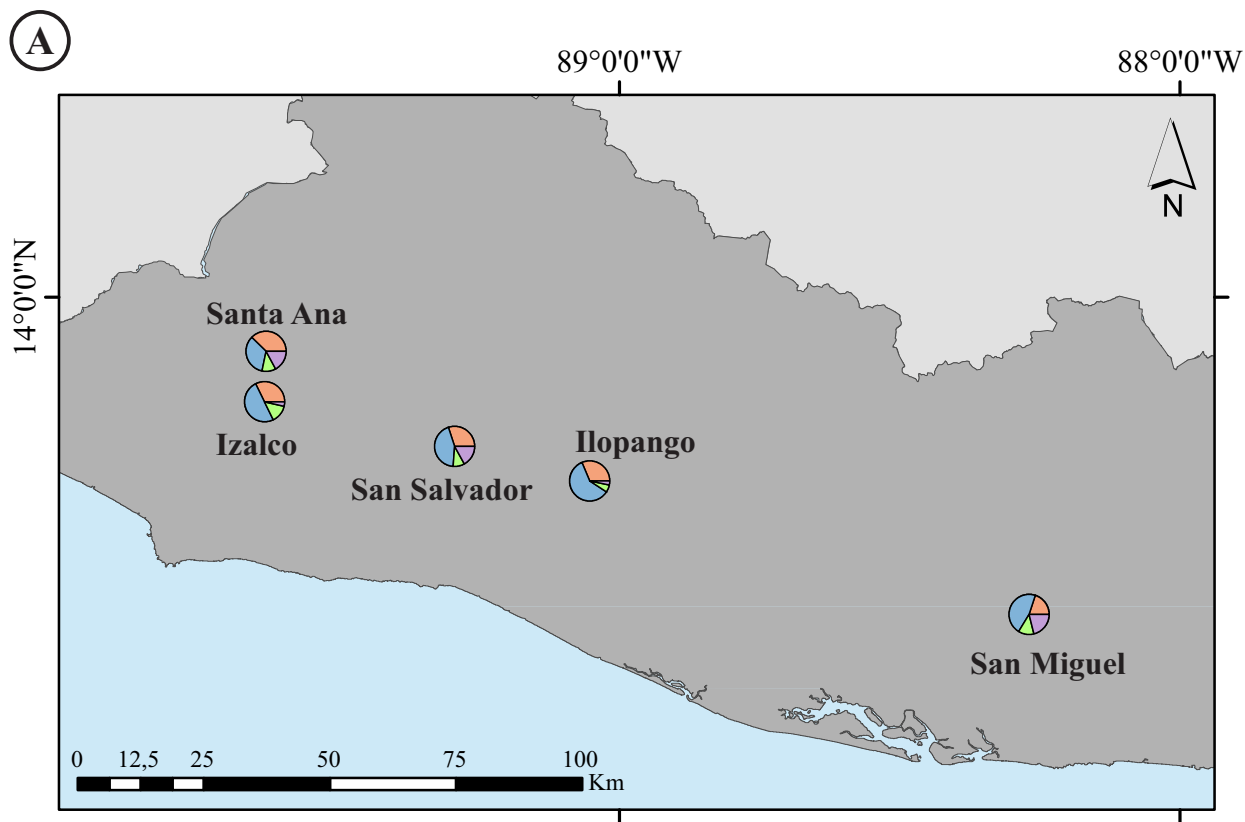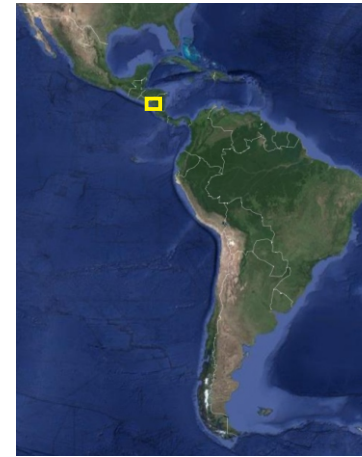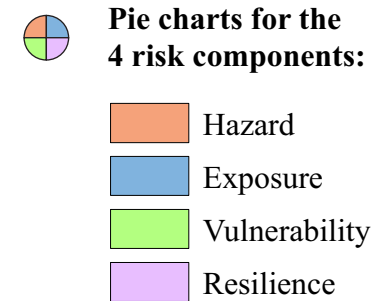

### Supplementary Material 3

A) Location of the Salvadoran volcanic systems with volcanic activity recorded in the last 1,000 years with their respective pie charts for the four risk components (hazard, exposure, vulnerability and resilience).

B) Comparative diagrams between previously published ranking (Palma et al., 2009) and our results. It is important to note that the ranking of Palma et al. (2009) was developed for some of the Central America volcanic systems based on the threat ( $H \times E$ , according to Ewert et al., 2005, 2007), while our work provides 2 different rankings: VRR (1), which considers  $H \times E \times V$ , and the VRR (2), that considers  $[(H \times E \times V) / (Res + 1)]$ .

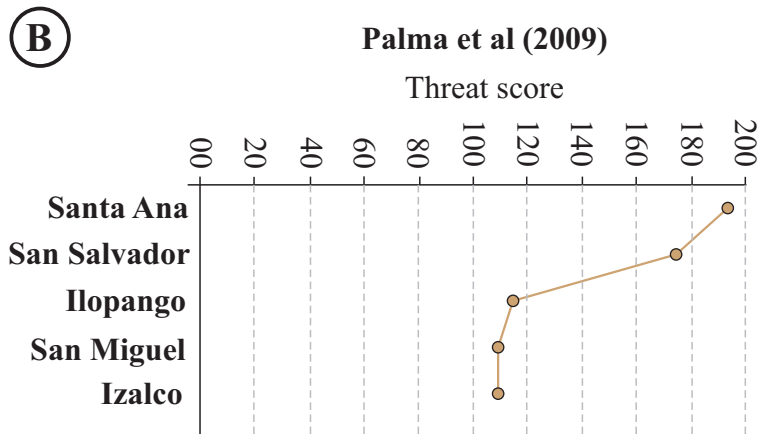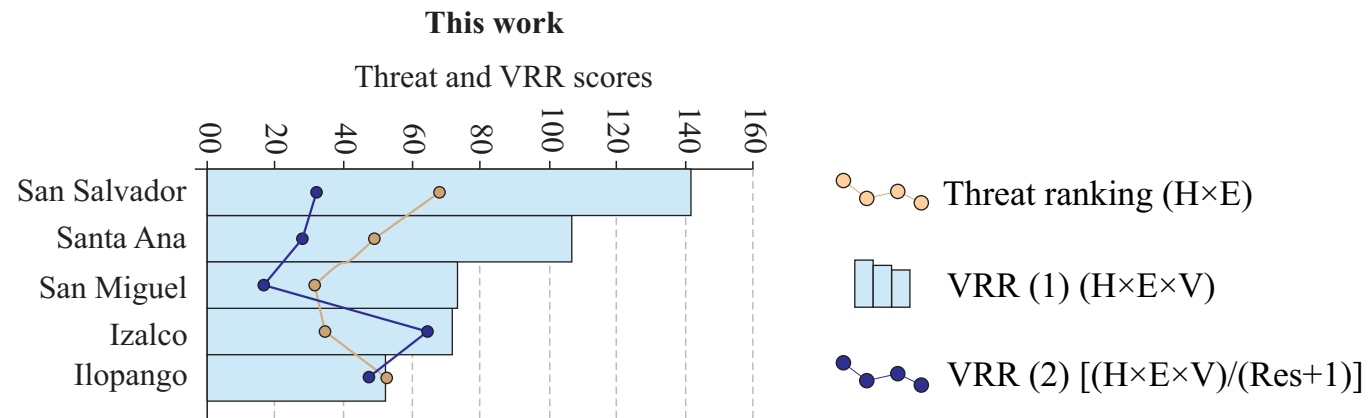

Supplement: Supplementary file 1 [file 31110457]
